# Supplementary material for: Effects of resveratrol on the structure and fluidity of lipid bilayers: a membrane biophysical study
Source: Royal Society of Chemistry journal article supplement (doi:10.1039/c5sm02905h), 2015-12-18
Supplement: c5sm02905h1.pdf [file c5sm02905h1.pdf]

## Supplementary Information

### Effects of resveratrol on the structure and fluidity of lipid bilayers: a membrane biophysical study.

Ana Rute Neves<sup>1</sup>, Cláudia Nunes<sup>1</sup>, Heinz Amenitsch<sup>2</sup> and Salette Reis<sup>1\*</sup>

<sup>1</sup> UCIBIO, REQUIMTE, Department of Chemical Sciences, Faculty of Pharmacy, University of Porto, Rua de Jorge Viterbo Ferreira, 228, 4050-313 Porto, Portugal.

<sup>2</sup> Institute of Inorganic Chemistry, Graz University of Technology, Stremayergasse 6/V, 8010 Graz, Austria.

**\* Corresponding author:**

Salette Reis

Department of Chemical Sciences, Faculty of Pharmacy of University of Porto

Rua de Jorge Viterbo Ferreira, 228, 4050-313 Porto, Portugal

TEL: (+351)220428672

FAX: (+351)226093390

E-mail: shreis@ff.up.pt

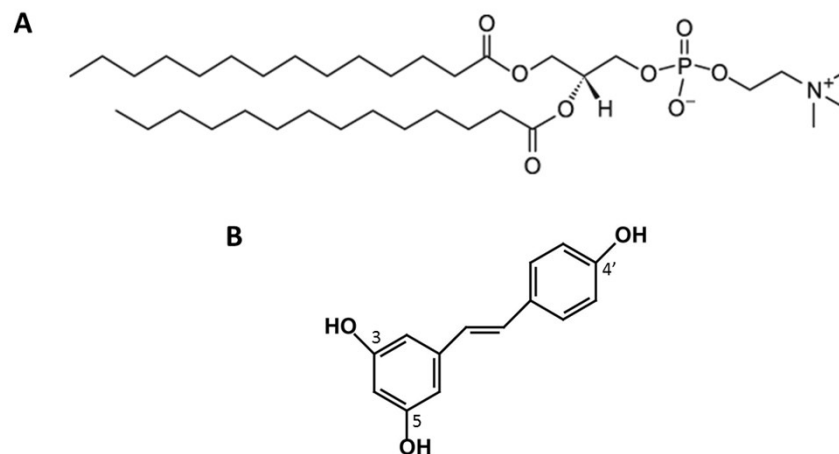

**Supplementary Figure 1** – Chemical structures of the intervenient species in this study. (A) 1,2-dimyristoyl-*sn*-glycero-3-phosphocholine – DMPC; (B) *trans*-resveratrol.

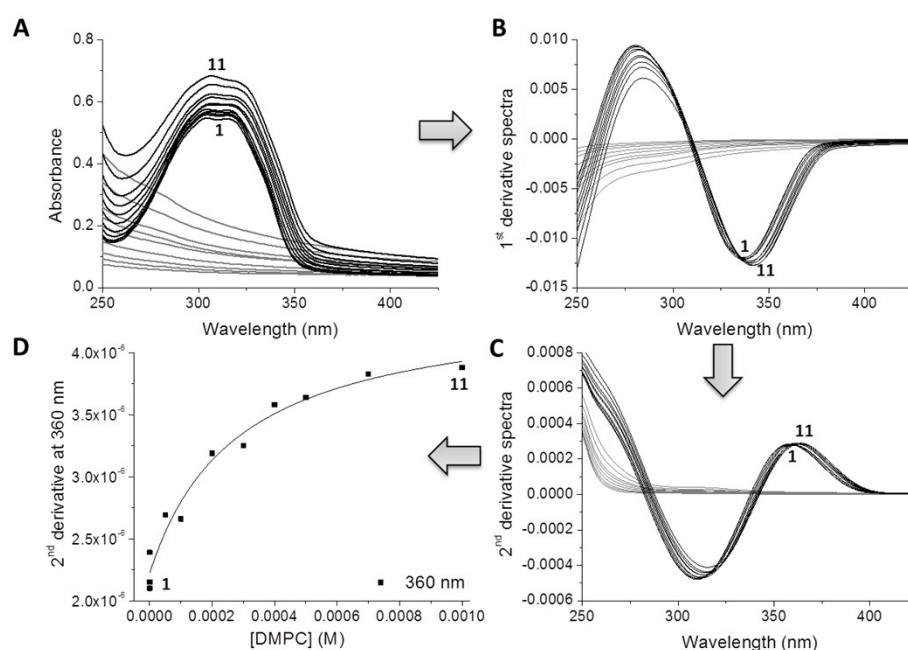

**Supplementary Figure 2** – Absorption spectra (A), first-derivative (B), and second-derivative (C) of resveratrol (20  $\mu$ M) incubated in LUVs of DMPC (black lines) and LUVs of DMPC without resveratrol (gray lines) at increasing lipid concentrations (from 1 to 11) in phosphate buffer at physiological conditions (pH 7.4, 37°C). The curve (D) represents the fitting curve to experimental second-derivative spectrophotometric data as a function of DMPC concentration, using a nonlinear least-squares regression method at wavelength 360 nm where the scattering is eliminated.

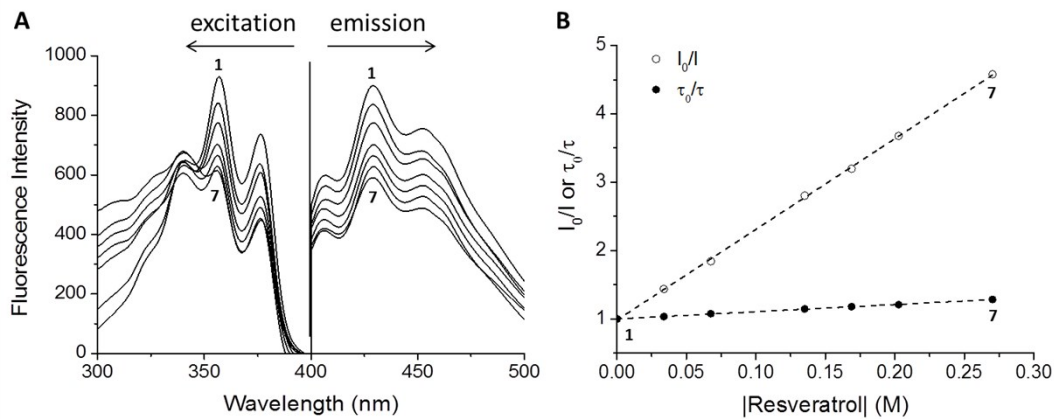

**Supplementary Figure 3** – Excitation and emission spectra of fluorescence quenching (A) and Stern-Volmer plots (B) of the probe DPH in LUVs of DMPC at physiological conditions (pH 7.4, 37°C) by increasing concentration of resveratrol (from 1 to 7). **Note:** In B open symbols ( $\circ$ ) represent Stern-Volmer plot obtained by steady-state fluorescence measurements ( $I_0/I$ ) and solid symbols ( $\bullet$ ) represent Stern-Volmer plot obtained by lifetime fluorescence measurements ( $\tau_0/\tau$ ).

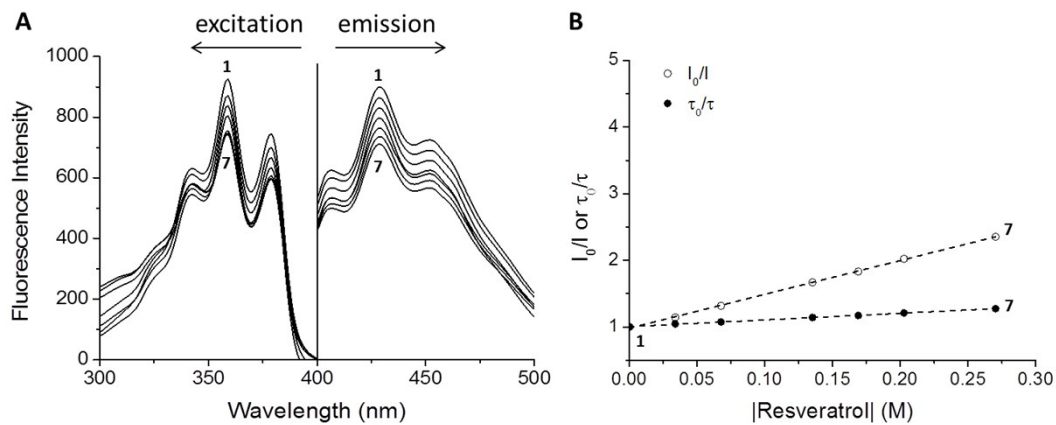

**Supplementary Figure 4** – Excitation and emission spectra of fluorescence quenching (A) and Stern-Volmer plots (B) of the probe TMA-DPH in LUVs of DMPC at physiological conditions (pH 7.4, 37°C) by increasing concentrations of resveratrol (from 1 to 7). **Note:** In B open symbols ( $\circ$ ) represent Stern-Volmer plot obtained by steady-state fluorescence measurements ( $I_0/I$ ) and solid symbols ( $\bullet$ ) represent Stern-Volmer plot obtained by lifetime fluorescence measurements ( $\tau_0/\tau$ ).

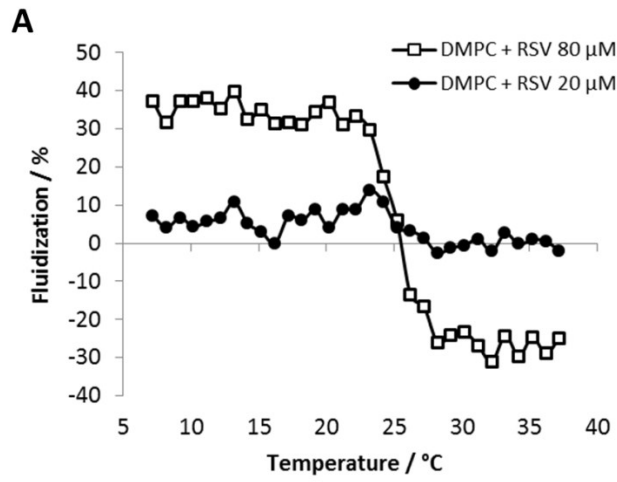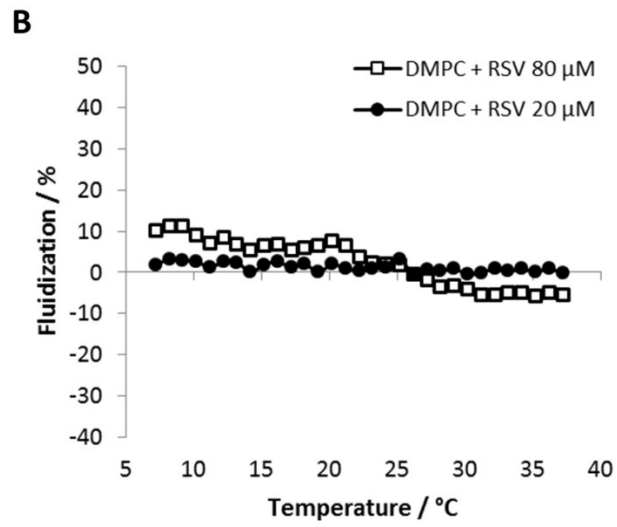

**Supplementary Figure 5** – Percentage of fluidization and stiffening effect detected as a function of temperature in the presence of resveratrol 20  $\mu$ M (●) and 80  $\mu$ M (□) in DMPC liposomes, at pH 7.4.

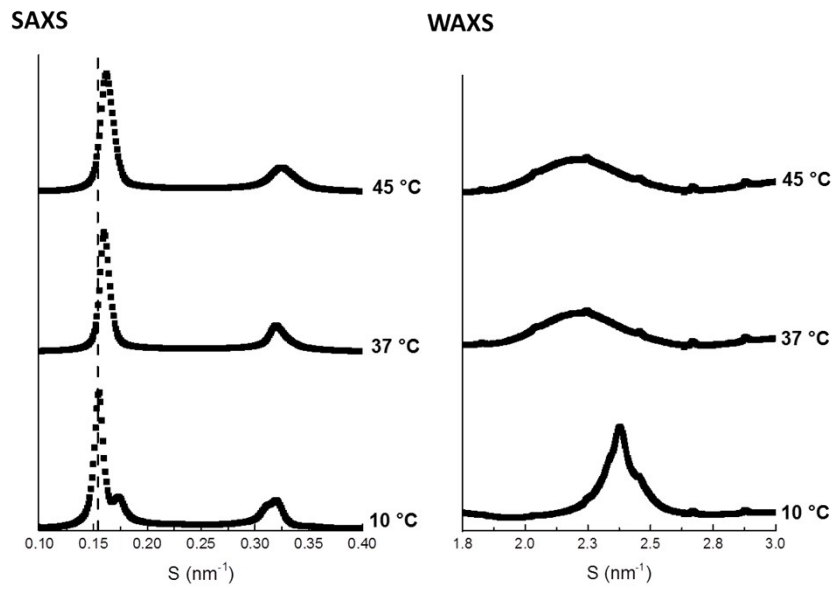

**Supplementary Figure 6** – Temperature-dependent small- and wide-angle X-ray diffraction patterns (SAXS and WAXS) of DMPC at pH 7.4.

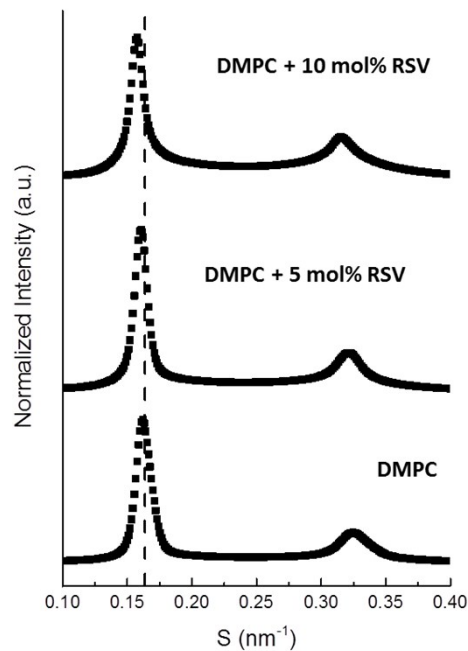

**Supplementary Figure 7** – Small-angle X-ray diffraction patterns (SAXS) of DMPC in the absence and in the presence of 5 and 10 mol% of resveratrol at 37 °C and pH 7.4.
